# Supplementary material for: Gingival Tissue MiRNA Expression Profiling and an Analysis of Periodontitis-Specific Circulating MiRNAs
Source: MDPI journal article supplement (doi:10.3390/ijms241511983), 2023-07-26
Supplement: s1 [file s1]

**Table S1.** Comparison of anthropometric and sociodemographic characteristics between participants groups.

| Characteristics                  | PD+ (N=144)   | PD- (N=86)    | <i>p</i> -value  | Total (N=230) |
|----------------------------------|---------------|---------------|------------------|---------------|
| <u>Sex</u>                       |               |               | <b>0.012</b>     |               |
| Female                           | 116 (80.6)    | 80 (93.0)     |                  | 196 (85.2)    |
| Male                             | 28 (19.4)     | 6 (7.0)       |                  | 34 (14.8)     |
| <u>Age (years)</u>               | 53.88 ± 10.39 | 47.59 ± 13.99 | <b>&lt;0.001</b> | 51.53 ± 12.22 |
| <u>Tobacco usage</u>             |               |               | <b>0.011</b>     |               |
| Never                            | 77(53.5)      | 60 (69.8)     |                  | 137 (59.6)    |
| Former                           | 40 (27.8)     | 21 (24.4)     |                  | 61 (26.5)     |
| Current smoker                   | 27 (18.8)     | 5 (5.8)       |                  | 32 (13.9)     |
| <u>Alcohol consumption</u>       |               |               | 0.806            |               |
| Never                            | 42 (29.2)     | 28 (32.6)     |                  | 70 (30.4)     |
| Once per week                    | 22 (15.3)     | 14 (16.3)     |                  | 36 (15.7)     |
| Once per month                   | 80 (55.6)     | 44 (51.2)     |                  | 124 (53.9)    |
| <u>Education</u>                 |               |               | 0.058            |               |
| Secondary                        | 26 (18.1)     | 6 (7.0)       |                  | 32 (13.9)     |
| Higher non-university            | 34 (23.6)     | 21 (24.4)     |                  | 55 (23.9)     |
| University education             | 84 (58.3)     | 59 (68.6)     |                  | 143 (62.2)    |
| <u>Annual dental prophylaxis</u> |               |               | 0.885            |               |
| ≤ Once per year                  | 98 (68.1)     | 57 (66.3)     |                  | 155 (67.4)    |
| ≥ Two times per year             | 46 (31.9)     | 29 (33.7)     |                  | 75 (32.6)     |
| <u>Tooth brushing frequency</u>  |               |               | 0.345            |               |
| ≤ Once per day                   | 39 (27.1)     | 18 (20.99)    |                  | 57 (24.8)     |
| ≥ Two times per day              | 105 (72.9)    | 68 (79.1)     |                  | 173 (75.2)    |
| <u>Approximal teeth cleaning</u> |               |               | <b>0.002</b>     |               |
| Yes                              | 100 (69.4)    | 75 (87.2)     |                  | 175 (76.1)    |
| No                               | 44 (30.6)     | 11 (12.8)     |                  | 55 (23.9)     |
| <u>BMI (kg/m<sup>2</sup>)</u>    | 25.49 ± 4.04  | 24.47 ± 4.08  | 0.066            | 25.11 ± 4.08  |

BMI: body mass index; PD: periodontitis.

Values are presented as number (%) or mean ± standard deviation. Significant *p*-values are presented in bold.

**Table S2.** List of all human (hsa-) mature miRNAs significantly deregulated (fold change  $\geq 1.5$  or  $\leq -1.5$ ;  $p \leq 0.05$ ) in periodontitis-affected tissues as compared to healthy gingiva.

| Mature miRNA | Change | Log <sub>2</sub> fold change | <i>p</i> -value |
|--------------|--------|------------------------------|-----------------|
| miR-3609     | UP     | 21.097752                    | 5.982961E-6     |
| miR-4539     | UP     | 13.911187                    | 0.0034073854    |
| miR-378c     | UP     | 13.431882                    | 2.5006192E-10   |
| miR-4441     | UP     | 12.385956                    | 0.003198552     |
| miR-30c-2-3p | UP     | 11.029368                    | 5.418997E-6     |
| miR-30a-3p   | UP     | 10.593317                    | 0.0017030366    |
| miR-5008-5p  | UP     | 10.312013                    | 0.0026602696    |
| miR-4697-5p  | UP     | 10.024114                    | 0.005105327     |
| miR-3192-3p  | UP     | 9.723486                     | 0.020792214     |
| miR-424-3p   | UP     | 9.569782                     | 0.0070886305    |
| miR-4470     | UP     | 8.668313                     | 0.005056986     |
| miR-3622b-5p | UP     | 8.42965                      | 4.78392E-4      |
| miR-378e     | UP     | 8.383979                     | 0.002259727     |
| miR-3064-5p  | UP     | 8.212205                     | 0.014977334     |
| miR-4633-5p  | UP     | 7.852584                     | 0.0011231073    |
| miR-4418     | UP     | 7.691243                     | 0.022530572     |
| miR-4513     | UP     | 6.820944                     | 0.006500478     |
| miR-6894-5p  | UP     | 6.8161774                    | 0.0067733973    |
| miR-7515     | UP     | 6.53498                      | 0.011592695     |
| miR-6861-5p  | UP     | 6.5065513                    | 0.009267809     |
| miR-4685-5p  | UP     | 6.432738                     | 0.0012611016    |
| miR-3202     | UP     | 6.3974605                    | 0.004982368     |
| miR-4690-5p  | UP     | 6.3139095                    | 0.013501005     |
| miR-4436b-3p | UP     | 6.1638193                    | 0.024903229     |
| miR-4419b    | UP     | 6.136029                     | 0.005548597     |
| miR-4769-5p  | UP     | 6.0760255                    | 0.011993192     |
| miR-4496     | UP     | 5.969935                     | 0.009363752     |
| miR-4429     | UP     | 5.90162                      | 0.0051523037    |
| miR-4502     | UP     | 5.797169                     | 0.047689036     |
| miR-4468     | UP     | 5.77554                      | 0.012844757     |
| miR-6837-5p  | UP     | 5.6663938                    | 0.007101256     |
| miR-4538     | UP     | 5.601535                     | 0.017772188     |
| miR-6857-5p  | UP     | 5.483419                     | 0.018755458     |
| miR-6856-5p  | UP     | 4.9241266                    | 0.01511683      |
| miR-3620-5p  | UP     | 4.8548417                    | 0.04710426      |
| miR-4776-5p  | UP     | 4.622304                     | 0.020126823     |
| miR-195-3p   | UP     | 4.517651                     | 0.011706592     |
| miR-4303     | UP     | 4.3227415                    | 0.027616186     |
| miR-450a-5p  | UP     | 4.2617965                    | 0.010951824     |
| miR-4746-5p  | UP     | 4.232331                     | 0.0366363       |
| miR-330-3p   | UP     | 4.2140427                    | 0.006444162     |
| miR-206      | UP     | 4.1199203                    | 0.042994898     |
| miR-4436a    | UP     | 4.060867                     | 0.02800539      |
| miR-23a-5p   | UP     | 3.9183314                    | 0.014982747     |
| miR-3605-5p  | UP     | 3.7601562                    | 0.029584713     |
| miR-6809-5p  | UP     | 3.7239244                    | 3.2156786E-5    |
| miR-3934-5p  | UP     | 3.630751                     | 0.023955273     |
| miR-500a-5p  | UP     | 3.5253022                    | 0.01454097      |
| miR-6848-5p  | UP     | 3.4622562                    | 0.014737124     |
| miR-575      | UP     | 3.4531016                    | 0.0011067445    |
| miR-4260     | UP     | 3.2527676                    | 0.04791562      |
| miR-145-5p   | UP     | 3.1845005                    | 0.021697244     |
| miR-342-5p   | UP     | 3.1619499                    | 0.048123162     |
| miR-298      | UP     | 3.120741                     | 0.029798966     |
| miR-630      | UP     | 3.0428808                    | 0.009250191     |
| miR-6860     | UP     | 2.9854276                    | 0.013185181     |
| miR-4741     | UP     | 2.973071                     | 0.0012034714    |

|              |    |           |              |
|--------------|----|-----------|--------------|
| miR-664b-3p  | UP | 2.9504206 | 0.005567918  |
| miR-5703     | UP | 2.8355925 | 0.011031834  |
| miR-6797-5p  | UP | 2.6717365 | 0.047991127  |
| miR-4778-5p  | UP | 2.65862   | 7.407193E-5  |
| miR-378f     | UP | 2.6352327 | 0.010649294  |
| miR-4667-5p  | UP | 2.5545022 | 1.3657047E-4 |
| miR-4449     | UP | 2.5493603 | 0.0019621078 |
| miR-4485-5p  | UP | 2.5399292 | 0.017961767  |
| miR-6740-5p  | UP | 2.445647  | 0.002228632  |
| miR-125a-3p  | UP | 2.44189   | 0.022030998  |
| miR-6867-5p  | UP | 2.4399276 | 2.5397007E-4 |
| miR-4530     | UP | 2.4129372 | 0.00584117   |
| miR-6833-5p  | UP | 2.346126  | 5.0820694E-5 |
| miR-4299     | UP | 2.3412848 | 0.030506475  |
| miR-6509-5p  | UP | 2.333467  | 0.0064273607 |
| miR-195-5p   | UP | 2.3163059 | 0.038429923  |
| miR-1273e    | UP | 2.310981  | 0.00876341   |
| miR-4417     | UP | 2.2925766 | 0.011851156  |
| miR-4673     | UP | 2.2872994 | 0.023105094  |
| miR-6769b-5p | UP | 2.255693  | 9.867043E-4  |
| miR-1273g-3p | UP | 2.2523165 | 0.026946027  |
| miR-140-3p   | UP | 2.2518585 | 9.440837E-5  |
| miR-155-5p   | UP | 2.2384453 | 0.01930039   |
| miR-3917     | UP | 2.230352  | 0.008262329  |
| miR-29c-5p   | UP | 2.1508615 | 0.006506333  |
| miR-6779-5p  | UP | 2.1423898 | 0.0020925484 |
| miR-126-5p   | UP | 2.120029  | 0.023130203  |
| miR-4800-5p  | UP | 2.1096334 | 4.4997458E-4 |
| miR-8071     | UP | 2.109437  | 0.0024428465 |
| miR-30a-5p   | UP | 2.105474  | 0.012757925  |
| miR-3135b    | UP | 2.063051  | 0.0022571874 |
| miR-146a-5p  | UP | 2.060337  | 0.015934054  |
| miR-3653-3p  | UP | 2.040937  | 0.04503131   |
| miR-6845-5p  | UP | 1.9597281 | 0.0012857373 |
| miR-6797-5p  | UP | 1.9570135 | 0.04799698   |
| miR-3198     | UP | 1.9380133 | 0.017172765  |
| miR-126-3p   | UP | 1.9271178 | 0.042272385  |
| miR-4726-5p  | UP | 1.924321  | 0.039449226  |
| miR-7846-3p  | UP | 1.9166954 | 7.393787E-4  |
| miR-6869-5p  | UP | 1.9058439 | 0.038597155  |
| miR-1587     | UP | 1.8904784 | 0.0021048759 |
| miR-6785-5p  | UP | 1.8745447 | 0.028154764  |
| miR-1236-5p  | UP | 1.8654809 | 1.9044965E-4 |
| miR-5787     | UP | 1.8623778 | 0.034411028  |
| miR-619-5p   | UP | 1.8036032 | 0.018589552  |
| miR-6089     | UP | 1.7807527 | 0.010131884  |
| miR-4688     | UP | 1.7667979 | 0.010726886  |
| miR-1273f    | UP | 1.7483053 | 0.0023988842 |
| miR-151b     | UP | 1.7471061 | 0.010215847  |
| miR-663a     | UP | 1.7395145 | 0.026515884  |
| miR-6880-5p  | UP | 1.7364151 | 0.016118988  |
| miR-939-5p   | UP | 1.7321529 | 0.011508225  |
| miR-146b-5p  | UP | 1.7312315 | 0.02566925   |
| miR-4306     | UP | 1.7062432 | 0.04094264   |
| miR-6727-5p  | UP | 1.6939839 | 0.022205204  |
| miR-4505     | UP | 1.6833506 | 0.004957147  |
| miR-454-3p   | UP | 1.6546508 | 0.005893807  |
| miR-6757-5p  | UP | 1.6535947 | 9.5336325E-4 |
| miR-4743-5p  | UP | 1.6515175 | 0.0036350158 |
| miR-6088     | UP | 1.6448472 | 0.017500624  |

|               |      |            |              |
|---------------|------|------------|--------------|
| let-7i-5p     | UP   | 1.6409252  | 0.025608461  |
| miR-6800-5p   | UP   | 1.6326962  | 0.041857917  |
| miR-7150      | UP   | 1.6209935  | 0.04087265   |
| miR-151a-5p   | UP   | 1.6191373  | 0.02545305   |
| miR-3679-5p   | UP   | 1.6182171  | 0.003557818  |
| miR-7110-5p   | UP   | 1.6021211  | 0.044018492  |
| miR-6086      | UP   | 1.5929787  | 2.3032364E-4 |
| miR-6807-5p   | UP   | 1.5885594  | 0.019388216  |
| miR-652-3p    | UP   | 1.5882461  | 0.0021738857 |
| miR-185-5p    | UP   | 1.584046   | 0.043001547  |
| miR-4646-5p   | UP   | 1.5774035  | 0.005415294  |
| miR-6124      | UP   | 1.5709971  | 0.0028802548 |
| miR-550a-3-5p | UP   | 1.5602642  | 0.031311247  |
| miR-423-5p    | UP   | 1.5595804  | 0.0073272916 |
| miR-6512-5p   | UP   | 1.5541701  | 0.009410762  |
| miR-4656      | UP   | 1.5516189  | 0.015074907  |
| miR-6819-5p   | UP   | 1.5400215  | 0.005807056  |
| miR-186-5p    | UP   | 1.5377585  | 5.2593544E-4 |
| miR-6831-5p   | UP   | 1.5365962  | 0.012452283  |
| miR-6778-5p   | UP   | 1.5287228  | 0.008788148  |
| miR-6510-5p   | UP   | 1.5262713  | 0.02339382   |
| miR-6780b-5p  | UP   | 1.5160023  | 0.013042399  |
| miR-4793-5p   | UP   | 1.5123715  | 0.0029080445 |
| miR-3065-3p   | DOWN | -19.018412 | 3.860544E-4  |
| miR-4310      | DOWN | -7.878956  | 0.018763479  |
| miR-4664-3p   | DOWN | -5.686357  | 0.026030745  |
| miR-203a-3p   | DOWN | -5.1764946 | 0.033030972  |
| miR-1246      | DOWN | -3.7977161 | 3.0806994E-5 |
| miR-4644      | DOWN | -3.494985  | 0.033787355  |
| miR-933       | DOWN | -3.3012435 | 0.0017494974 |
| miR-197-5p    | DOWN | -3.2965791 | 6.982468E-4  |
| miR-1290      | DOWN | -3.0894573 | 0.004031998  |
| miR-6824-3p   | DOWN | -2.8438542 | 0.034796074  |
| miR-210-3p    | DOWN | -2.6959174 | 0.023188422  |
| miR-4788      | DOWN | -2.4317288 | 3.4581788E-4 |
| miR-636       | DOWN | -2.399055  | 0.03535577   |
| miR-6848-3p   | DOWN | -2.3979795 | 0.007723487  |
| miR-6076      | DOWN | -2.198916  | 0.03849026   |
| miR-6777-3p   | DOWN | -2.119105  | 0.01939316   |
| miR-1908-3p   | DOWN | -2.0877237 | 0.0078876065 |
| miR-4271      | DOWN | -2.061026  | 0.04601549   |
| miR-1224-5p   | DOWN | -2.0331528 | 0.02894065   |
| miR-937-5p    | DOWN | -1.969027  | 0.021730866  |
| miR-6800-3p   | DOWN | -1.9490974 | 0.003593747  |
| miR-1304-3p   | DOWN | -1.9389137 | 0.034340326  |
| miR-1234-3p   | DOWN | -1.9386121 | 0.024319692  |
| miR-425-3p    | DOWN | -1.8585198 | 0.022727754  |
| miR-1238-3p   | DOWN | -1.8552052 | 0.029386519  |
| miR-191-3p    | DOWN | -1.8225256 | 0.04069585   |
| miR-1825      | DOWN | -1.7523289 | 0.03864391   |
| miR-6765-3p   | DOWN | -1.7489574 | 0.030737506  |
| miR-6126      | DOWN | -1.7358894 | 0.0048215017 |
| miR-1228-3p   | DOWN | -1.7327114 | 0.020878114  |
| miR-6069      | DOWN | -1.7129666 | 0.043092586  |
| miR-4665-3p   | DOWN | -1.6860542 | 0.011447039  |
| miR-4497      | DOWN | -1.653489  | 0.028820565  |
| miR-6127      | DOWN | -1.5607718 | 0.02591698   |
| miR-6165      | DOWN | -1.5342814 | 0.035260037  |
| miR-6756-5p   | DOWN | -1.5064877 | 0.03753026   |
| miR-4261      | DOWN | -1.5037313 | 0.04282309   |

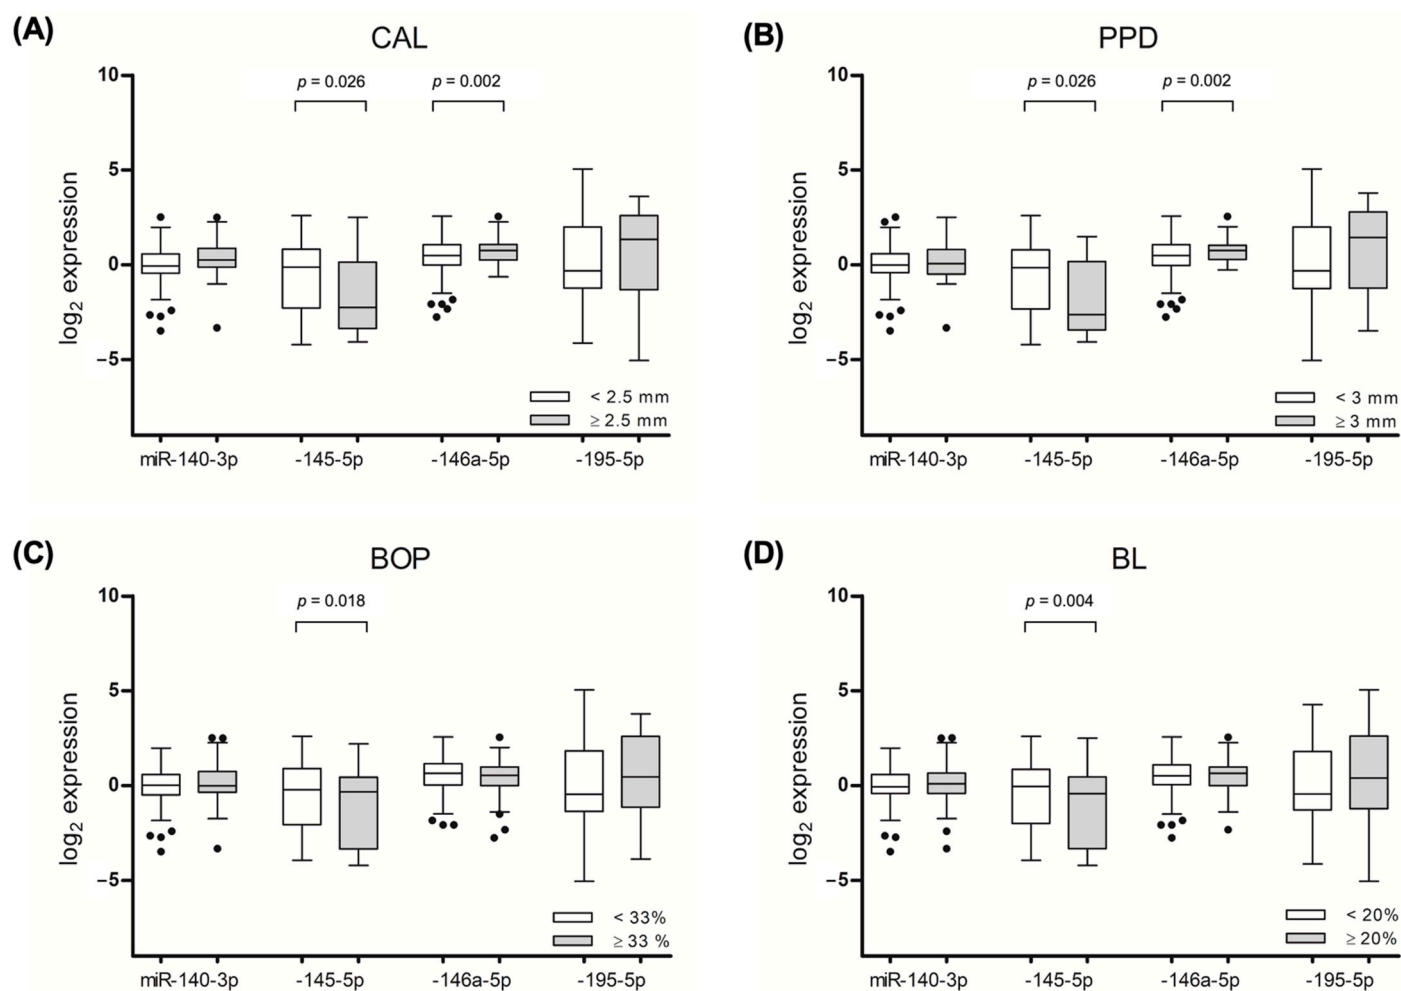

**Figure S1.** Comparison of blood plasma miR-140-3p, miR-145-5p, -146a-5p, and -195-5p levels with regard to cut-off points of (A) mean clinical attachment loss (CAL); (B) periodontal probing depth (PPD); (C) bleeding on probing (BOP); (D) bone loss (BL). The bands inside the boxes indicate the median, the whiskers show the data interval, and the dots represent outliers.

**Table S3.** Periodontal, rheumatological and tobacco usage status (*N* or mean  $\pm$  SD) of study participants of genome-wide miRNA expression profiling stage.

| Periodontal status, <i>N</i>         | PD+, 8          |              | PD−, 8       |              |
|--------------------------------------|-----------------|--------------|--------------|--------------|
| RA status, <i>N</i>                  | RA+, 2          | RA−, 2       | RA+, 2       | RA−, 2       |
| PD clinical parameters               |                 |              |              |              |
| CAL (mm)                             | 3.25 ± 0.44     | 3.13 ± 0.75  | 1.1 ± 0.66   | 1.3 ± 0.70   |
|                                      | 3.19 ± 0.57     |              | 1.2 ± 0.64   |              |
| PPD (mm)                             | 3.23 ± 0.24     | 3 ± 0.12     | 2.13 ± 0.24  | 2 ± 0.27     |
|                                      | 3.11 ± 0.21     |              | 2.06 ± 0.24  |              |
| BOP (%)                              | 59.5 ± 11.79    | 53.75 ± 8.85 | 12.75 ± 1.5  | 11.75 ± 2.22 |
|                                      | 56.63 ± 10.13   |              | 12.25 ± 1.83 |              |
| BL (proportion of root length)       | 36.12 ± 7.34    | 30.39 ± 7.26 | 15.4 ± 6.79  | 15.85 ± 5.38 |
|                                      | 33.26 ± 7.42    |              | 15.63 ± 5.68 |              |
| Missing teeth ( <i>N</i> ) BOP (%)   | 11.5 ± 6.02     | 8.5 ± 3.87   | 4.25 ± 5.44  | 5 ± 4.97     |
|                                      | 10 ± 4.96       |              | 4.63 ± 4.84  |              |
| PD Stages                            |                 |              |              |              |
| Stage III ( <i>N</i> )               | <div>11</div> 2 |              | N.A.         |              |
| Stage IV ( <i>N</i> )                | <div>33</div> 6 |              | N.A.         |              |
| RA clinical parameters and treatment |                 |              |              |              |
| DAS28-CRP (score)                    | 4.07 ± 1.2      | N.A.         | 3.83 ± 2.53  | N.A.         |
| RAID (score)                         | 3.96 ± 2.65     | N.A.         | 3.96 ± 1.0   | N.A.         |
| HAQ (score)                          | 0.68 ± 0.5      | N.A.         | 1.15 ± 0.16  | N.A.         |
| Tobacco usage                        |                 |              |              |              |
| Former ( <i>N</i> )                  | 3               | 3            | 0            | 0            |
|                                      | 6               |              | 0            |              |
| Never ( <i>N</i> )                   | 1               | 1            | 4            | 4            |
|                                      | 2               |              | 8            |              |

Abbreviations: bDMARDs: biologic disease-modifying antirheumatic drugs; BL: bone loss; BOP: bleeding on probing; CAL: clinical attachment loss; DAS28-CRP: Disease Activity Score 28-joint count C reactive protein; HAQ: health assessment questionnaire; N.A.: not applicable; PD: periodontitis; PPD: periodontal probing depth; RA: rheumatoid arthritis; RAID: rheumatoid arthritis impact of disease; SD: standard deviation; sDMARDs: synthetic disease-modifying antirheumatic drugs.
